# Supplementary material
Source: publisher figshare collection journal article supplement (https://sage.figshare.com/ndownloader/files/22306788)
Supplement: Supplementary file 1 [file 22306788]

Supplement 1. Table of Example Questions from Stakeholder Interview Guides.

| **Stakeholder Group Interview Guide** | **Sample Questions** |
| --- | --- |
| Model Hospital 1 Staff | How does data flow through the continuum of care with the patient between EMS to the Hospital? Please focus on the patient medical record in your response.  What are the top three challenges you think are most important to coordinating the stroke system of care in this community? |
| EMS | Please describe your understanding of a stroke system of care and the role of EMS in that system.  What feedback do you receive from the hospital on patient diagnosis and outcomes?   - If feedback is received, what happens with that information? - How is feedback shared with the crew who provided care? - How are opportunities for improvement identified from this feedback? |
| Patients and Caregivers | What was your experience when you arrived at Model Hospital 1?   - What were your experiences as you moved between different units in the hospital? - Were you and/or your family kept aware of what was happening throughout the process? - What were some of the most memorable experiences from your Hospital stroke care (negative or positive)?   What improvements in the availability of community resources would you suggest to improve stroke care and recovery? |
